# Supplementary material for: Factors Controlling Contemporary Suspended Sediment Yield in the Caucasus Region
Source: MDPI journal article supplement (doi:10.3390/w13223173), 2021-11-10
Supplement: s1 [file s1]

## Supplementary material

**Table S1.** Description of Köppen-Geiger climate symbols and defining criteria.

| Vegetation group     | Description                                          | Criteria from [1]                                                                                                  |
|----------------------|------------------------------------------------------|--------------------------------------------------------------------------------------------------------------------|
| <b>Temperate (C)</b> |                                                      | <b><math>T_{hot}&gt;10</math> &amp; <math>0&lt;T_{cold}&lt;18</math></b>                                           |
| Cfa                  | Warm temperate climate, fully humid with hot summer  | $P_{sdry}>40$ & $P_{sdry}>P_{wwet}/3$ & $P_{wdry}>P_{swet}/10$ & $T_{hot}\geq 22$                                  |
| Cfb                  | Warm temperate climate, fully humid with warm summer | $P_{sdry}>40$ & $P_{sdry}>P_{wwet}/3$ & $P_{wdry}>P_{swet}/10$ & $T_{hot}<22$ & $T_{mon10}\geq 4$                  |
| Csa                  | Warm temperate climate with dry and hot summer       | $P_{sdry}<40$ & $P_{sdry}<P_{wwet}/3$ & $T_{hot}\geq 22$                                                           |
| <b>Cold (D)</b>      |                                                      | <b><math>T_{hot}&gt;10</math> &amp; <math>T_{cold}\leq 0</math></b>                                                |
| Dfa                  | Snow climate, fully humid with hot summer            | $P_{sdry}>40$ & $P_{sdry}>P_{wwet}/3$ & $P_{wdry}>P_{swet}/10$ & $T_{hot}\geq 22$                                  |
| Dfb                  | Snow climate, fully humid with warm summer           | $P_{sdry}>40$ & $P_{sdry}>P_{wwet}/3$ & $P_{wdry}>P_{swet}/10$ & $T_{hot}<22$ & $T_{mon10}\geq 4$                  |
| Dfc                  | Snow climate, fully humid with cold summer           | $P_{sdry}>40$ & $P_{sdry}>P_{wwet}/3$ & $P_{wdry}>P_{swet}/10$ & $T_{hot}<22$ & $T_{mon10}\geq 4$ & $T_{cold}>-38$ |
| Dsa                  | Snow climate with dry and hot summer                 | $P_{sdry}<40$ & $P_{sdry}<P_{wwet}/3$ & $T_{hot}\geq 22$                                                           |
| Dsb                  | Snow climate with dry and warm summer                | $P_{sdry}<40$ & $P_{sdry}<P_{wwet}/3$ & $T_{hot}<22$ & $T_{mon10}\geq 4$                                           |
| <b>Polar (E)</b>     |                                                      | <b><math>T_{hot}&lt;10</math></b>                                                                                  |
| ET                   | Tundra climate                                       | $T_{hot}> 0$                                                                                                       |

$T_{hot}$ —temperature of the hottest month,  $T_{cold}$ —temperature of the coldest month,  $T_{mon10}$ —number of months where the temperature is above 10,  $P_{dry}$ —precipitation of the driest month,  $P_{sdry}$ —precipitation of the driest month in summer,  $P_{wdry}$ —precipitation of the driest month in winter,  $P_{swet}$ —precipitation of the wettest month in summer,  $P_{wwet}$ —precipitation of the wettest month in winter.

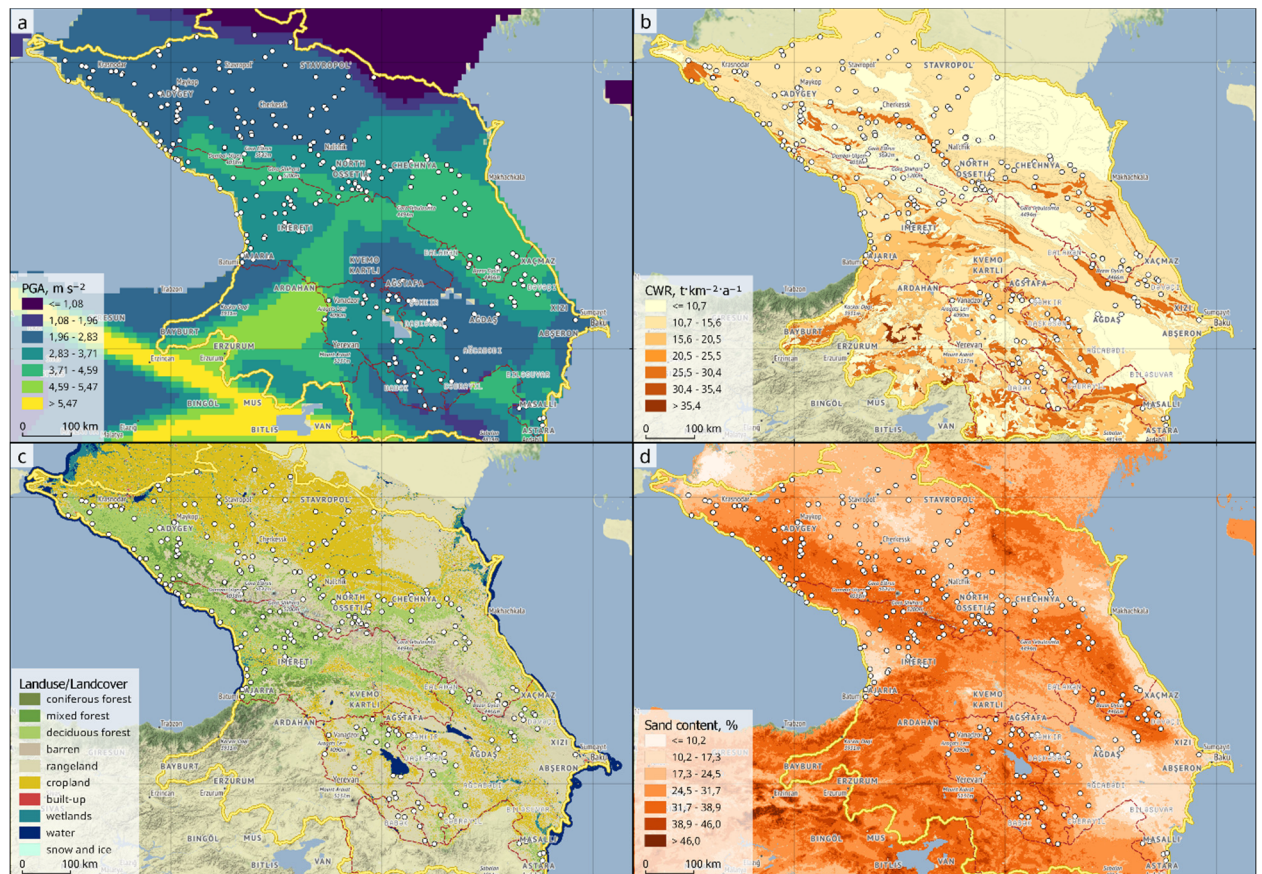

**Figure S1.** Spatial distribution of SSY factors: (a) estimated peak ground acceleration (PGA,  $\text{m s}^{-2}$ ) with an exceedance probability of 10% in 50 years, as derived from the GSHAP data set [2]; (b) average chemical weathering rates (CWR,  $\text{t km}^{-2} \text{yr}^{-1}$ ) calculated for every individual GLiM [3] class by Hartmann et al. [4]; (c) Caucasus land-cover classification for 2015 derived from Buchner et al. [5]; (d) mean sand content (SAND, %) in the intrinsic topsoil (0–30 cm depth) from the International Soil Reference and Information Centre (ISRIC) SoilGrids database [6].

## References

1. Peel, M.C.; Finlayson, B.L.; McMahon, T.A. Updated World Map of the Köppen-Geiger Climate Classification. *Hydrology and Earth System Sciences* **2007**, *11*, 1633–1644, doi:10.5194/hess-11-1633-2007.
2. Giardini, D.; Grünthal, G.; Shedlock, K.M.; Zhang, P. The GSHAP Global Seismic Hazard Map. *Annals of Geophysics* **1999**, *42*, doi:10.4401/ag-3784.
3. Hartmann, J.; Moosdorf, N. The New Global Lithological Map Database GLiM: A Representation of Rock Properties at the Earth Surface. *Geochemistry, Geophysics, Geosystems* **2012**, *13*, doi:10.1029/2012GC004370.
4. Hartmann, J.; Moosdorf, N.; Lauerwald, R.; Hinderer, M.; West, A.J. Global Chemical Weathering and Associated P-Release — The Role of Lithology, Temperature and Soil Properties. *Chemical Geology* **2014**, *363*, 145–163, doi:10.1016/j.chemgeo.2013.10.025.
5. Buchner, J.; Yin, H.; Frantz, D.; Kuemmerle, T.; Askerov, E.; Bakuradze, T.; Bleyhl, B.; Elizbarashvili, N.; Komarova, A.; Lewińska, K.E.; et al. Land-Cover Change in the Caucasus Mountains since 1987 Based on the Topographic Correction of Multi-Temporal Landsat Composites. *Remote Sensing of Environment* **2020**, *248*, 111967, doi:10.1016/j.rse.2020.111967.
6. Hengl, T.; Jesus, J.M. de; Heuvelink, G.B.M.; Gonzalez, M.R.; Kilibarda, M.; Blagotić, A.; Shangguan, W.; Wright, M.N.; Geng, X.; Bauer-Marschallinger, B.; et al. SoilGrids250m: Global Gridded Soil Information Based on Machine Learning. *PLOS ONE* **2017**, *12*, e0169748, doi:10.1371/journal.pone.0169748.
